# Supplementary material for: A photo-cross-linkable polymeric binder for silicon anodes in lithium ion batteries
Source: Royal Society of Chemistry journal article supplement (doi:10.1039/c3ra42447b), 2013-01-01
Supplement: c3ra42447b.pdf [file c3ra42447b.pdf]

Electronic Supplementary Information

## **Photo-Cross-Linkable Polymeric Binder for Silicon Anodes in Lithium Ion Batteries**

**Yuwon Park,<sup>a,b,§</sup> Sueun Lee,<sup>a,§</sup> Si-Hoon Kim,<sup>c</sup> Bo Yun Jang,<sup>d</sup> Joon Soo Kim,<sup>d</sup> Seung M. Oh,<sup>b</sup> Ju-Young Kim,<sup>c</sup> Nam-Soon Choi,<sup>a</sup> Kyu Tae Lee\*<sup>a</sup> and Byeong-Su Kim\*<sup>a</sup>**

<sup>a</sup> Interdisciplinary School of Green Energy and KIER-UNIST Advanced Center for Energy, Ulsan National Institute of Science and Technology (UNIST), 100 Banyeon-ri, Eonyang-eup, Ulju-gun, Ulsan 689-798, South Korea

<sup>b</sup> School of Chemical and Biological Engineering, Seoul National University, 1 Gwanangno, Gwanak-gu, Seoul 151-742, South Korea

<sup>c</sup> School of Mechanical and Advanced Materials Engineering, Ulsan National Institute of Science and Technology (UNIST), 100 Banyeon-ri, Eonyang-eup, Ulju-gun, Ulsan 689-798, South Korea

<sup>d</sup> Korea Institute of Energy Research (KIER), Daejeon 305-343, South Korea

<sup>§</sup> These authors contributed equally to this work.

E-mail: ktleee@unist.ac.kr (K.T. Lee.); bskim19@unist.ac.kr (B.-S. Kim.).

## Electronic Supplementary Information

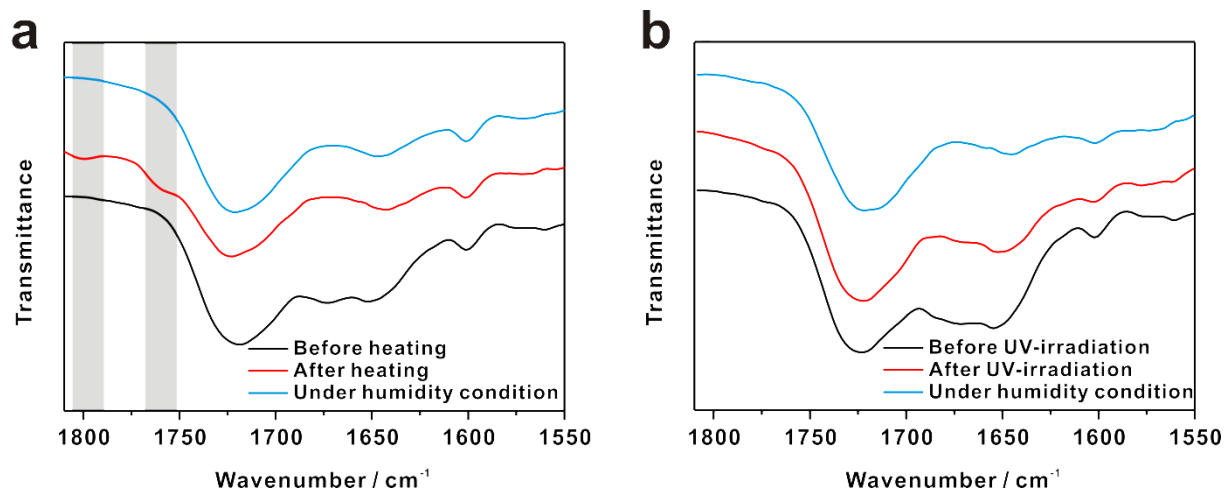

**Fig. S1** FT-IR spectra of PAA-BP binder of (a) reversible thermal cross-linking (b) irreversible photo-cross-linking. In Fig. S1a, the peak corresponding to the anhydride at 1760 and 1800 cm<sup>-1</sup> indicated by grey region disappeared under humidity condition, resulting in reversible cross-linking. In contrast, no changes were observed in Fig. S1b, indicating the irreversible cross-linking can endure the environment changes. The PAA-BP film was firstly dried at 150 °C for 2 h under vacuum and then placed in a humidity chamber at a relative humidity of 80% for 24 h.

Electronic Supplementary Information

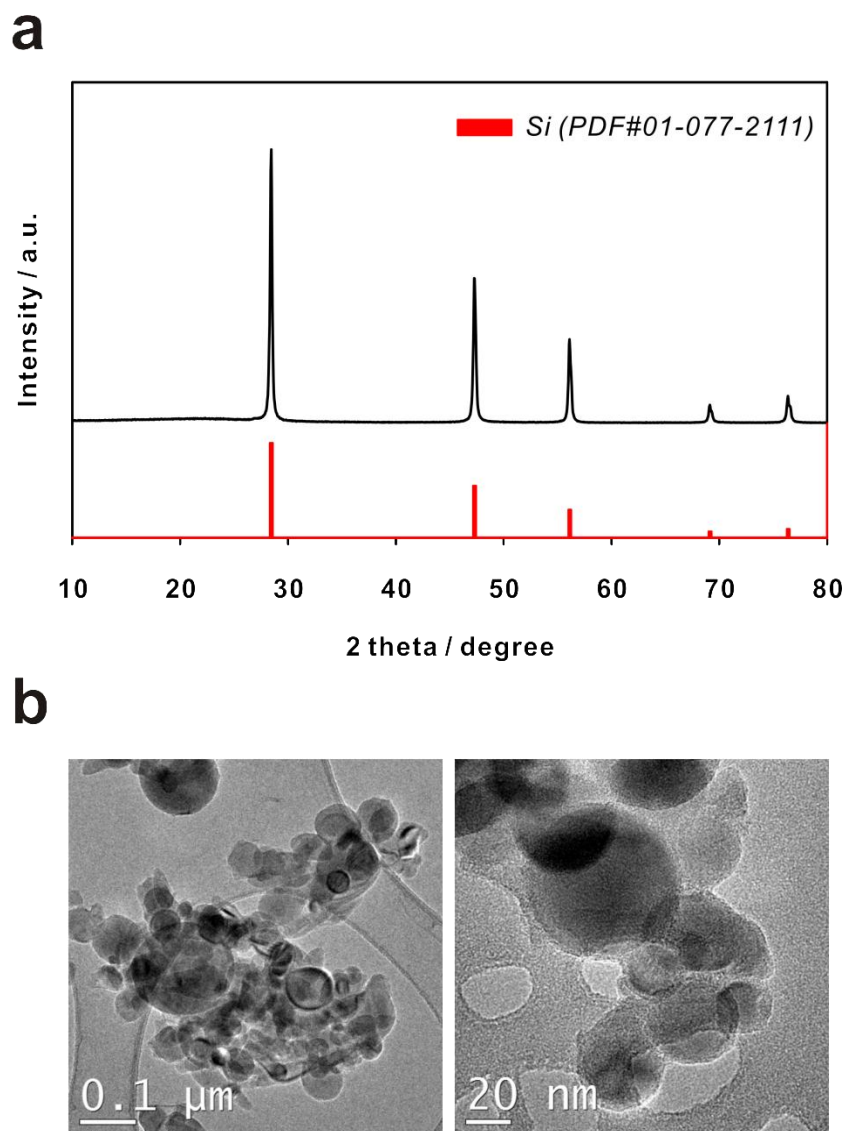

**Fig. S2** (a) XRD pattern and (b) TEM images of carbon-coated silicon active-material used in the study.

Electronic Supplementary Information

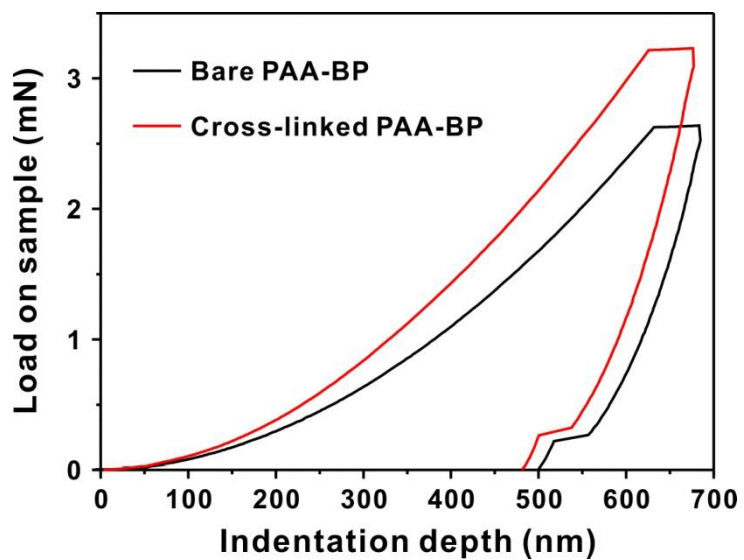

**Fig. S3** Representative load-indentation depth curves of bare and cross-linked PAA-BP measured by nanoindentation.
